# Supplementary material for: Positive selection of a CD36 nonsense variant in sub-Saharan Africa, but no association with severe malaria phenotypes
Source: PubMed Central journal article supplement — Hum Mol Genet. 2009 Apr 29;18(14):2683–92. doi: 10.1093/hmg/ddp192 (PMC2701331; doi:10.1093/hmg/ddp192), 2009-04-29
Supplement: ddp192_1.pdf [file ddp192_1.pdf]

Supplementary Material to “Positive selection of a *CD36* nonsense variant in sub-Saharan Africa, but no association with severe malaria phenotypes.” Fry *et al.*

Contents:

Table S1. Global survey of *CD36* T1264G allele frequencies.

Table S2. *CD36* SNP association results ( $P < 0.05$ ), in Gambian family and case-control studies.

Table S3 A-F. UNPHASED analysis of pooled Gambian family and case-control studies.

Table S4. 54 SNPs genotyped and analyzed in the HGDP-CEPH Diversity Panel.

Table S5. Sample sizes and demographics by study design and region of origin.

Table S6 A-E. *CD36* genotyping assay performance.

Figure S1. Distant decay in EHH surrounding T1264G in the HapMap Yoruba.

Figure S2. The effects of using offspring genotypes to resolve phase of parental haplotypes.

**Table S1. Global survey of CD36 T1264G allele frequencies.**

| Region             | Population           | Geographic origin            | G allele | Total 2n | Freq  | Climate | Prevalence |
|--------------------|----------------------|------------------------------|----------|----------|-------|---------|------------|
| Sub-Saharan Africa | Yoruba               | Nigeria                      | 13       | 25       | 0.26  | 99.4%   | 48.0%      |
| Sub-Saharan Africa | San                  | Namibia                      | 0        | 6        | 0     | 7.6%    | 6.1%       |
| Sub-Saharan Africa | Mbuti Pygmies        | Democratic Republic of Congo | 0        | 7        | 0     | 99.9%   | 55.3%      |
| Sub-Saharan Africa | Mandenka             | Senegal                      | 0        | 21       | 0     | 96.9%   | 37.4%      |
| Sub-Saharan Africa | Biaka Pygmies        | Central African Republic     | 3        | 26       | 0.058 | 99.9%   | 41.7%      |
| Sub-Saharan Africa | Bantu S.W. (Herero)  | South Africa                 | 0        | 2        | 0     | 14.8%   | -          |
| Sub-Saharan Africa | Bantu S.E. (Zulu)    | South Africa                 | 0        | 1        | 0     | " "     | -          |
| Sub-Saharan Africa | Bantu S.E. (Tswana)  | South Africa                 | 0        | 2        | 0     | " "     | -          |
| Sub-Saharan Africa | Bantu S.E. (S.Sotho) | South Africa                 | 0        | 1        | 0     | " "     | -          |
| Sub-Saharan Africa | Bantu S.E. (Pedi)    | South Africa                 | 0        | 1        | 0     | " "     | -          |
| Sub-Saharan Africa | Kasem                | Ghana                        | 140      | 474      | 0.148 | 98.3%   | 48.6%      |
| Sub-Saharan Africa | Nankan               | Ghana                        | 63       | 249      | 0.127 | " "     | " "        |
| Sub-Saharan Africa | Buli                 | Ghana                        | 3        | 14       | 0.107 | " "     | " "        |
| Sub-Saharan Africa | Fula                 | Gambia                       | 4        | 136      | 0.015 | 100.0%  | 36.0%      |
| Sub-Saharan Africa | Jola                 | Gambia                       | 2        | 89       | 0.011 | " "     | " "        |
| Sub-Saharan Africa | Mandinka             | Gambia                       | 5        | 173      | 0.014 | " "     | " "        |
| Sub-Saharan Africa | Manjago              | Gambia                       | 2        | 19       | 0.053 | " "     | " "        |
| Sub-Saharan Africa | Serehuli             | Gambia                       | 5        | 52       | 0.048 | " "     | " "        |
| Sub-Saharan Africa | Serere               | Gambia                       | 1        | 19       | 0.026 | " "     | " "        |
| Sub-Saharan Africa | Woloff               | Gambia                       | 5        | 94       | 0.027 | " "     | " "        |
| Sub-Saharan Africa | Chonyi               | Kenya                        | 37       | 183      | 0.101 | 21.2%   | 36.3%      |
| Sub-Saharan Africa | Duruma               | Kenya                        | 8        | 79       | 0.051 | " "     | " "        |
| Sub-Saharan Africa | Giriama              | Kenya                        | 75       | 405      | 0.093 | " "     | " "        |
| Sub-Saharan Africa | Kauma                | Kenya                        | 4        | 55       | 0.036 | " "     | " "        |
| Sub-Saharan Africa | Bantu N.E.           | Kenya                        | 1        | 11       | 0.045 | " "     | " "        |
| Sub-Saharan Africa | Malawian             | Malawi                       | 72       | 405      | 0.089 | 77.0%   | 58.2%      |
| Oceania            | Papuan               | New Guinea                   | 0        | 17       | 0     | -       | -          |
| Oceania            | NAN Melanesian       | Bougainville                 | 0        | 19       | 0     | -       | -          |
| North Africa       | Mozabite             | Algeria (Mzab)               | 0        | 23       | 0     | -       | -          |
| Middle East        | Palestinian          | Israel (Central)             | 0        | 50       | 0     | -       | -          |
| Middle East        | Druze                | Israel (Carmel)              | 0        | 44       | 0     | -       | -          |
| Middle East        | Bedouin              | Israel (Negev)               | 0        | 44       | 0     | -       | -          |
| Europe             | Tuscan               | Italy                        | 0        | 8        | 0     | -       | -          |
| Europe             | Sardinian            | Italy                        | 0        | 28       | 0     | -       | -          |
| Europe             | Russian              | Russia                       | 0        | 25       | 0     | -       | -          |
| Europe             | Orcadian             | Orkney Islands               | 0        | 15       | 0     | -       | -          |
| Europe             | North Italian        | Italy (Bergamo)              | 0        | 13       | 0     | -       | -          |
| Europe             | French Basque        | France                       | 0        | 22       | 0     | -       | -          |

**Table S1. Global survey of CD36 T1264G allele frequencies (continued).**

| Region  | Population | Geographic origin | G allele | Total 2n | Freq  | Climate | Prevalence |
|---------|------------|-------------------|----------|----------|-------|---------|------------|
| Europe  | French     | France            | 0        | 29       | 0     | -       | -          |
| Europe  | Adygei     | Russia Caucasus   | 0        | 17       | 0     | -       | -          |
| Asia    | Yizu       | China             | 0        | 10       | 0     | -       | -          |
| Asia    | Yakut      | Siberia           | 0        | 23       | 0     | -       | -          |
| Asia    | Xibo       | China             | 0        | 5        | 0     | -       | -          |
| Asia    | Uygur      | China             | 0        | 9        | 0     | -       | -          |
| Asia    | Tujia      | China             | 0        | 10       | 0     | -       | -          |
| Asia    | Tu         | China             | 0        | 6        | 0     | -       | -          |
| Asia    | Sindhi     | Pakistan          | 0        | 23       | 0     | -       | -          |
| Asia    | She        | China             | 0        | 9        | 0     | -       | -          |
| Asia    | Pathan     | Pakistan          | 0        | 23       | 0     | -       | -          |
| Asia    | Oroqen     | China             | 0        | 10       | 0     | -       | -          |
| Asia    | Naxi       | China             | 0        | 10       | 0     | -       | -          |
| Asia    | Mongola    | China             | 0        | 10       | 0     | -       | -          |
| Asia    | Miaozu     | China             | 0        | 10       | 0     | -       | -          |
| Asia    | Makrani    | Pakistan          | 1        | 24       | 0.021 | -       | -          |
| Asia    | Lahu       | China             | 0        | 9        | 0     | -       | -          |
| Asia    | Kalash     | Pakistan          | 0        | 24       | 0     | -       | -          |
| Asia    | Japanese   | Japan             | 0        | 26       | 0     | -       | -          |
| Asia    | Hezhen     | China             | 0        | 9        | 0     | -       | -          |
| Asia    | Hazara     | Pakistan          | 0        | 21       | 0     | -       | -          |
| Asia    | Han        | China             | 0        | 41       | 0     | -       | -          |
| Asia    | Daur       | China             | 0        | 10       | 0     | -       | -          |
| Asia    | Dai        | China             | 0        | 9        | 0     | -       | -          |
| Asia    | Cambodians | Cambodia          | 0        | 11       | 0     | -       | -          |
| Asia    | Burusho    | Pakistan          | 0        | 21       | 0     | -       | -          |
| Asia    | Brahui     | Pakistan          | 0        | 24       | 0     | -       | -          |
| Asia    | Balochi    | Pakistan          | 0        | 22       | 0     | -       | -          |
| America | Surui      | Brazil            | 0        | 21       | 0     | -       | -          |
| America | Pima       | Mexico            | 0        | 25       | 0     | -       | -          |
| America | Maya       | Mexico            | 0        | 25       | 0     | -       | -          |
| America | Karitiana  | Brazil            | 0        | 24       | 0     | -       | -          |
| America | Colombians | Colombia          | 0        | 13       | 0     | -       | -          |

NOTE.- G allele, number of G alleles found; Total 2n, total number of individuals genotyped; Freq, minor allele frequency; Climate, proportion of countries population living in areas >75% suitable for malaria (i.e. endemic; perennial or seasonal areas); Prevalence, average national prevalence of malaria. Epidemiological statistics based on 1990 data (MARA-Lite Software 3.0.0, <http://www.mara.org.za>).

**Table S2. CD36 SNP association results ( $P < 0.05$ ), in Gambian family and case-control studies.**

| Study  | Phenotype | Model        | SNP        | Lower | OR    | Upper  | $P$ -value | Perm.  |
|--------|-----------|--------------|------------|-------|-------|--------|------------|--------|
| Family | CM        | recessive    | rs10216184 | 0.24  | 0.49  | 0.98   | 0.043      |        |
| CC     | SA        | overdominant | rs10480808 | 1.06  | 1.45  | 1.99   | 0.022      |        |
| CC     | Severe    | allelic      | rs1049654  | 1.03  | 1.21  | 1.43   | 0.021      | 0.05   |
| CC     | Severe    | recessive    | rs1049654  | 1.04  | 1.43  | 1.96   | 0.028      |        |
| Family | CM        | overdominant | rs10499859 | 0.55  | 0.71  | 0.92   | 0.0099     |        |
| CC     | CM        | overdominant | rs1537593  | 0.55  | 0.73  | 0.96   | 0.026      |        |
| Family | SA        | allelic      | rs1572230  | 0.45  | 0.65  | 0.95   | 0.026      | 0.038  |
| Family | SA        | dominant     | rs1572230  | 0.43  | 0.64  | 0.94   | 0.025      |        |
| Family | SA        | overdominant | rs1572230  | 0.44  | 0.66  | 0.97   | 0.034      |        |
| CC     | SA        | overdominant | rs1722501  | 0.42  | 0.59  | 0.83   | 0.0026     |        |
| CC     | Severe    | overdominant | rs1722501  | 0.61  | 0.78  | 0.98   | 0.036      |        |
| CC     | SA        | overdominant | rs1924     | 1.02  | 1.40  | 1.93   | 0.039      |        |
| CC     | SA        | recessive    | rs3173798  | 0.07  | 0.23  | 0.77   | 0.017      |        |
| CC     | Severe    | recessive    | rs3211817  | 0.06  | 0.24  | 0.92   | 0.037      |        |
| Family | CM        | overdominant | rs3211822  | 1.01  | 1.25  | 1.54   | 0.038      |        |
| Family | CM        | recessive    | rs3211822  | 0.50  | 0.69  | 0.97   | 0.034      |        |
| Family | Severe    | overdominant | rs3211822  | 1.03  | 1.18  | 1.34   | 0.014      |        |
| CC     | SA        | overdominant | rs3211828  | 1.02  | 1.41  | 1.96   | 0.037      |        |
| CC     | SA        | recessive    | rs3211828  | 0.15  | 0.36  | 0.88   | 0.025      |        |
| CC     | Severe    | recessive    | rs3211842  | 0.50  | 0.69  | 0.96   | 0.026      |        |
| CC     | SA        | overdominant | rs3211867  | 1.09  | 1.51  | 2.07   | 0.012      |        |
| CC     | SA        | recessive    | rs3211869  | 0.11  | 0.33  | 0.95   | 0.040      |        |
| Family | CM        | overdominant | rs3211883  | 0.60  | 0.74  | 0.92   | 0.0071     |        |
| CC     | SA        | allelic      | rs3211899  | 0.35  | 0.56  | 0.89   | 0.015      | 0.0077 |
| CC     | SA        | dominant     | rs3211899  | 0.32  | 0.53  | 0.87   | 0.011      |        |
| CC     | SA        | overdominant | rs3211899  | 0.32  | 0.52  | 0.86   | 0.010      |        |
| Family | CM        | recessive    | rs3211909  | 0.11  | 0.32  | 0.93   | 0.036      |        |
| Family | Severe    | recessive    | rs3211928  | 0.36  | 0.53  | 0.77   | 0.0010     |        |
| Family | CM        | allelic      | rs3211930  | 0.37  | 0.58  | 0.92   | 0.020      | 0.02   |
| Family | CM        | dominant     | rs3211930  | 0.37  | 0.59  | 0.95   | 0.029      |        |
| CC     | Severe    | allelic      | rs3211931  | 1.01  | 1.22  | 1.47   | 0.036      | 0.467  |
| CC     | Severe    | dominant     | rs3211931  | 1.00  | 1.26  | 1.59   | 0.046      |        |
| Family | CM        | recessive    | rs3211942  | 1.74  | 15.03 | 129.80 | 0.013      |        |
| CC     | Severe    | allelic      | rs4728191  | 0.61  | 0.76  | 0.96   | 0.019      | 0.034  |
| CC     | Severe    | dominant     | rs4728191  | 0.58  | 0.76  | 0.99   | 0.041      |        |
| Family | SA        | allelic      | rs4728191  | 0.50  | 0.70  | 0.99   | 0.042      | 0.072  |
| Family | SA        | dominant     | rs4728191  | 0.48  | 0.69  | 0.99   | 0.043      |        |
| CC     | CM        | recessive    | rs6968407  | 1.06  | 1.89  | 3.38   | 0.031      |        |
| CC     | Severe    | overdominant | rs6968407  | 0.62  | 0.79  | 0.99   | 0.045      |        |

NOTE.- Study, family or case-control (CC), Phenotype, cerebral malaria (CM), severe malarial anaemia (SA) or all severe malaria cases (Severe); Model, genetic model; Genotype/allele, compared with genotype 1/1 (major allele homozygote) or allele 1 (major allele); OR, odds ratio; Lower/Upper, 95% confidence interval of odds ratio; Perm, permutation  $P$ -value calculated using HAPLOVIEW (100,000 permutations).

**Table S3A. UNPHASED analysis of pooled Gambian family and case-control studies (Severe malaria).**

| Severe Marker | 1/2 vs. 1/1 |             | 2/2 vs. 1/1 |             | Allelic | Over  | Dom   | Rec   |
|---------------|-------------|-------------|-------------|-------------|---------|-------|-------|-------|
|               | OR          | 95% CI      | OR          | 95% CI      |         |       |       |       |
| def           | 0.83        | 0.66 - 1.05 | 1.59        | 0.74 - 3.39 | 0.390   | 0.091 | 0.194 | 0.152 |
| G1439C        | 0.86        | 0.64 - 1.15 | 1.99        | 0.46 - 8.67 | 0.463   | 0.269 | 0.353 | 0.291 |
| T1264G        | 0.93        | 0.67 - 1.31 | 0.72        | 0.08 - 6.48 | 0.649   | 0.705 | 0.672 | 0.796 |
| rs10215288    | 0.91        | 0.81 - 1.03 | 1.01        | 0.82 - 1.22 | 0.457   | 0.100 | 0.185 | 0.536 |
| rs10216184    | 1.11        | 0.99 - 1.26 | 1.11        | 0.84 - 1.47 | 0.098   | 0.108 | 0.077 | 0.714 |
| rs10480808    | 1.12        | 0.99 - 1.27 | 1.14        | 0.97 - 1.34 | 0.086   | 0.288 | 0.057 | 0.462 |
| rs1049654     | 1.02        | 0.9 - 1.15  | 1.02        | 0.86 - 1.2  | 0.814   | 0.821 | 0.768 | 0.959 |
| rs10499857    | 1.00        | 0.89 - 1.12 | 0.91        | 0.71 - 1.17 | 0.673   | 0.824 | 0.890 | 0.443 |
| rs1054516     | 0.99        | 0.89 - 1.12 | 0.97        | 0.77 - 1.21 | 0.806   | 0.991 | 0.876 | 0.787 |
| rs1194178     | 0.99        | 0.87 - 1.11 | 0.97        | 0.74 - 1.27 | 0.762   | 0.842 | 0.782 | 0.864 |
| rs1194180     | 0.93        | 0.83 - 1.04 | 0.92        | 0.74 - 1.14 | 0.199   | 0.260 | 0.171 | 0.698 |
| rs11971740    | 1.00        | 0.89 - 1.12 | 0.95        | 0.78 - 1.16 | 0.722   | 0.828 | 0.909 | 0.576 |
| rs12706912    | 0.99        | 0.88 - 1.11 | 0.91        | 0.76 - 1.09 | 0.381   | 0.728 | 0.685 | 0.277 |
| rs13222488    | 1.06        | 0.94 - 1.19 | 1.20        | 0.95 - 1.52 | 0.125   | 0.602 | 0.234 | 0.183 |
| rs13228738    | 1.12        | 0.99 - 1.28 | 1.17        | 0.82 - 1.67 | 0.069   | 0.105 | 0.068 | 0.553 |
| rs1334511     | 0.89        | 0.79 - 1    | 0.98        | 0.81 - 1.19 | 0.322   | 0.049 | 0.092 | 0.555 |
| rs1358337     | 1.01        | 0.9 - 1.14  | 1.03        | 0.87 - 1.22 | 0.731   | 0.987 | 0.801 | 0.767 |
| rs1413659     | 0.95        | 0.85 - 1.07 | 0.95        | 0.76 - 1.18 | 0.428   | 0.454 | 0.384 | 0.848 |
| rs1413661     | 1.03        | 0.92 - 1.16 | 0.98        | 0.8 - 1.19  | 0.877   | 0.493 | 0.652 | 0.664 |
| rs1527463     | 1.06        | 0.93 - 1.22 | 1.06        | 0.73 - 1.56 | 0.397   | 0.413 | 0.380 | 0.859 |
| rs1537593     | 1.04        | 0.91 - 1.18 | 1.12        | 0.95 - 1.31 | 0.167   | 0.694 | 0.401 | 0.177 |
| rs1572230     | 0.89        | 0.77 - 1.03 | 0.74        | 0.45 - 1.2  | 0.060   | 0.155 | 0.084 | 0.313 |
| rs17154155    | 1.01        | 0.89 - 1.14 | 1.07        | 0.91 - 1.26 | 0.429   | 0.700 | 0.713 | 0.362 |
| rs17154246    | 1.01        | 0.9 - 1.14  | 0.98        | 0.77 - 1.25 | 0.966   | 0.817 | 0.887 | 0.851 |
| rs1722501     | 0.93        | 0.83 - 1.04 | 0.99        | 0.8 - 1.21  | 0.403   | 0.175 | 0.222 | 0.757 |
| rs1722502     | 1.03        | 0.91 - 1.15 | 1.03        | 0.84 - 1.26 | 0.688   | 0.722 | 0.662 | 0.906 |
| rs1722505     | 1.02        | 0.91 - 1.14 | 0.98        | 0.8 - 1.2   | 0.968   | 0.651 | 0.796 | 0.722 |
| rs17263407    | 1.13        | 1 - 1.29    | 1.26        | 0.9 - 1.78  | 0.031   | 0.088 | 0.039 | 0.311 |
| rs17266080    | 1.14        | 0.99 - 1.3  | 0.96        | 0.65 - 1.43 | 0.163   | 0.054 | 0.081 | 0.600 |
| rs1761661     | 1.01        | 0.9 - 1.13  | 0.97        | 0.79 - 1.18 | 0.892   | 0.780 | 0.954 | 0.697 |
| rs1761662     | 1.02        | 0.9 - 1.14  | 0.92        | 0.71 - 1.19 | 0.849   | 0.668 | 0.918 | 0.485 |
| rs1761663     | 1.02        | 0.9 - 1.16  | 1.03        | 0.88 - 1.21 | 0.676   | 0.909 | 0.696 | 0.789 |
| rs1924        | 0.96        | 0.86 - 1.08 | 0.85        | 0.68 - 1.05 | 0.163   | 0.901 | 0.349 | 0.159 |
| rs2366855     | 0.99        | 0.88 - 1.12 | 0.95        | 0.76 - 1.19 | 0.720   | 0.991 | 0.831 | 0.674 |
| rs3173798     | 0.96        | 0.85 - 1.08 | 0.90        | 0.7 - 1.16  | 0.328   | 0.589 | 0.391 | 0.523 |
| rs3173800     | 0.99        | 0.87 - 1.13 | 1.19        | 0.85 - 1.68 | 0.656   | 0.787 | 0.909 | 0.296 |

NOTE.- Heterozygotes (1/2) or minor allele homozygotes (2/2) compared with major allele homozygotes (1/1); OR, odds ratio; 95% C(onfidence) I(nterval); def, both CD36 deficiency alleles pooled; P-values for 4 genetic models: Rec(essive), Over(dominant), Dom(inant) and Allelic.

**Table S3B. UNPHASED analysis of pooled Gambian family- and case-control studies (Severe malaria) - *continued*.**

| Severe<br>Marker | 1/2 vs. 1/1 |             | 2/2 vs. 1/1 |             | Allelic | Over  | Dom   | Rec   |
|------------------|-------------|-------------|-------------|-------------|---------|-------|-------|-------|
|                  | OR          | 95% CI      | OR          | 95% CI      |         |       |       |       |
| rs3211810        | 1.00        | 0.88 - 1.14 | 0.90        | 0.62 - 1.31 | 0.804   | 0.915 | 0.932 | 0.580 |
| rs3211817        | 1.09        | 0.94 - 1.27 | 0.94        | 0.54 - 1.64 | 0.382   | 0.252 | 0.298 | 0.734 |
| rs3211821        | 1.04        | 0.92 - 1.17 | 0.91        | 0.73 - 1.14 | 0.865   | 0.367 | 0.721 | 0.297 |
| rs3211822        | 1.11        | 0.98 - 1.25 | 1.03        | 0.87 - 1.22 | 0.417   | 0.092 | 0.136 | 0.643 |
| rs3211828        | 0.99        | 0.88 - 1.11 | 0.83        | 0.66 - 1.05 | 0.269   | 0.837 | 0.572 | 0.130 |
| rs3211842        | 1.03        | 0.91 - 1.15 | 0.94        | 0.78 - 1.12 | 0.667   | 0.412 | 0.881 | 0.307 |
| rs3211849        | 1.02        | 0.9 - 1.15  | 1.02        | 0.87 - 1.19 | 0.821   | 0.845 | 0.772 | 0.952 |
| rs3211850        | 1.02        | 0.9 - 1.17  | 0.96        | 0.65 - 1.41 | 0.873   | 0.711 | 0.785 | 0.778 |
| rs3211867        | 0.95        | 0.85 - 1.07 | 0.88        | 0.73 - 1.05 | 0.152   | 0.846 | 0.284 | 0.224 |
| rs3211869        | 0.96        | 0.86 - 1.08 | 0.92        | 0.71 - 1.18 | 0.411   | 0.645 | 0.470 | 0.592 |
| rs3211870        | 1.09        | 0.96 - 1.24 | 1.07        | 0.91 - 1.26 | 0.366   | 0.323 | 0.197 | 0.914 |
| rs3211883        | 0.97        | 0.86 - 1.09 | 1.10        | 0.93 - 1.32 | 0.518   | 0.271 | 0.877 | 0.142 |
| rs3211886        | 1.01        | 0.88 - 1.16 | 1.18        | 0.78 - 1.77 | 0.638   | 0.988 | 0.790 | 0.448 |
| rs3211888        | 1.01        | 0.83 - 1.22 | 0.82        | 0.37 - 1.82 | 0.912   | 0.893 | 0.993 | 0.622 |
| rs3211897        | 1.05        | 0.86 - 1.28 | -           | -           | 0.919   | 0.569 | 0.816 | 0.033 |
| rs3211899        | 0.89        | 0.76 - 1.04 | 1.19        | 0.67 - 2.13 | 0.269   | 0.114 | 0.169 | 0.431 |
| rs3211909        | 1.03        | 0.9 - 1.17  | 0.87        | 0.6 - 1.25  | 0.927   | 0.614 | 0.842 | 0.403 |
| rs3211911        | 0.85        | 0.69 - 1.06 | 1.35        | 0.51 - 3.59 | 0.232   | 0.127 | 0.169 | 0.467 |
| rs3211913        | 1.01        | 0.9 - 1.14  | 0.88        | 0.73 - 1.07 | 0.380   | 0.432 | 0.868 | 0.133 |
| rs3211923        | 1.02        | 0.78 - 1.34 | 0.72        | 0.08 - 6.12 | 0.942   | 0.871 | 0.906 | 0.755 |
| rs3211928        | 1.16        | 1.03 - 1.3  | 0.86        | 0.65 - 1.13 | 0.327   | 0.006 | 0.046 | 0.078 |
| rs3211930        | 0.87        | 0.7 - 1.07  | 0.21        | 0.03 - 1.56 | 0.085   | 0.232 | 0.140 | 0.104 |
| rs3211931        | 1.11        | 0.99 - 1.24 | 1.07        | 0.84 - 1.37 | 0.143   | 0.094 | 0.083 | 0.947 |
| rs3211942        | 1.07        | 0.9 - 1.26  | 1.88        | 0.95 - 3.72 | 0.190   | 0.534 | 0.318 | 0.076 |
| rs4545029        | 1.00        | 0.89 - 1.13 | 0.94        | 0.75 - 1.19 | 0.757   | 0.875 | 0.914 | 0.606 |
| rs4728191        | 0.88        | 0.77 - 1.01 | 0.85        | 0.56 - 1.28 | 0.060   | 0.084 | 0.058 | 0.606 |
| rs6960369        | 0.96        | 0.85 - 1.07 | 0.96        | 0.8 - 1.16  | 0.522   | 0.507 | 0.438 | 0.914 |
| rs6968407        | 1.06        | 0.94 - 1.19 | 1.31        | 1.04 - 1.64 | 0.048   | 0.770 | 0.180 | 0.036 |
| rs6969989        | 1.13        | 1 - 1.27    | 1.02        | 0.74 - 1.41 | 0.111   | 0.041 | 0.052 | 0.777 |
| rs6972923        | 1.01        | 0.89 - 1.15 | 1.04        | 0.88 - 1.21 | 0.674   | 0.902 | 0.801 | 0.675 |
| rs6973242        | 1.04        | 0.93 - 1.18 | 1.23        | 0.98 - 1.56 | 0.120   | 0.804 | 0.287 | 0.102 |
| rs7807607        | 1.01        | 0.9 - 1.13  | 0.98        | 0.8 - 1.21  | 0.955   | 0.850 | 0.951 | 0.817 |
| rs819436         | 1.00        | 0.89 - 1.12 | 1.08        | 0.86 - 1.36 | 0.707   | 0.815 | 0.914 | 0.490 |
| rs9784998        | 1.00        | 0.89 - 1.12 | 0.84        | 0.67 - 1.06 | 0.364   | 0.649 | 0.750 | 0.128 |
| rs997906         | 1.05        | 0.92 - 1.21 | 1.12        | 0.75 - 1.68 | 0.399   | 0.534 | 0.438 | 0.641 |

NOTE.- Heterozygotes (1/2) or minor allele homozygotes (2/2) compared with major allele homozygotes (1/1); OR, odds ratio; 95% C(onfidence) I(nterval); *P*-values for 4 genetic models: Rec(essive), Over(dominant), Dom(inant) and Allelic.

**Table S3C. UNPHASED analysis of pooled Gambian family- and case-control studies (CM).**

| CM<br>Marker | 1/2 vs. 1/1 |             | 2/2 vs. 1/1 |              | Allelic | Over  | Dom   | Rec   |
|--------------|-------------|-------------|-------------|--------------|---------|-------|-------|-------|
|              | OR          | 95% CI      | OR          | 95% CI       |         |       |       |       |
| def          | 0.85        | 0.6 - 1.21  | 1.52        | 0.5 - 4.63   | 0.634   | 0.351 | 0.472 | 0.462 |
| G1439C       | 0.83        | 0.52 - 1.32 | 2.52        | 0.39 - 16.22 | 0.677   | 0.380 | 0.513 | 0.267 |
| T1264G       | 1.00        | 0.62 - 1.62 | -           | -            | 0.811   | 0.901 | 0.951 | 0.317 |
| rs10215288   | 0.93        | 0.78 - 1.11 | 1.00        | 0.74 - 1.35  | 0.696   | 0.392 | 0.487 | 0.755 |
| rs10216184   | 1.26        | 1.05 - 1.51 | 1.01        | 0.65 - 1.57  | 0.069   | 0.011 | 0.019 | 0.612 |
| rs10480808   | 1.12        | 0.93 - 1.37 | 1.13        | 0.89 - 1.44  | 0.296   | 0.447 | 0.215 | 0.710 |
| rs1049654    | 1.00        | 0.84 - 1.2  | 1.00        | 0.78 - 1.29  | 0.973   | 0.969 | 0.964 | 0.998 |
| rs10499857   | 0.98        | 0.82 - 1.17 | 0.70        | 0.47 - 1.05  | 0.235   | 0.824 | 0.552 | 0.087 |
| rs1054516    | 1.00        | 0.84 - 1.2  | 1.02        | 0.72 - 1.44  | 0.941   | 0.994 | 0.967 | 0.926 |
| rs1194178    | 0.91        | 0.76 - 1.09 | 1.19        | 0.8 - 1.79   | 0.825   | 0.221 | 0.457 | 0.266 |
| rs1194180    | 0.97        | 0.82 - 1.16 | 0.95        | 0.7 - 1.3    | 0.707   | 0.817 | 0.723 | 0.842 |
| rs11971740   | 0.95        | 0.8 - 1.13  | 0.94        | 0.69 - 1.27  | 0.543   | 0.630 | 0.523 | 0.819 |
| rs12706912   | 1.00        | 0.84 - 1.19 | 1.00        | 0.77 - 1.3   | 0.984   | 0.988 | 0.983 | 0.994 |
| rs13222488   | 1.08        | 0.9 - 1.3   | 1.35        | 0.95 - 1.91  | 0.119   | 0.682 | 0.248 | 0.139 |
| rs13228738   | 1.21        | 1 - 1.48    | 1.48        | 0.87 - 2.5   | 0.025   | 0.085 | 0.034 | 0.246 |
| rs1334511    | 0.81        | 0.68 - 0.98 | 0.80        | 0.6 - 1.08   | 0.037   | 0.080 | 0.023 | 0.519 |
| rs1358337    | 0.99        | 0.83 - 1.19 | 1.15        | 0.9 - 1.46   | 0.348   | 0.458 | 0.797 | 0.183 |
| rs1413659    | 0.96        | 0.81 - 1.15 | 0.93        | 0.67 - 1.29  | 0.600   | 0.785 | 0.642 | 0.747 |
| rs1413661    | 0.98        | 0.82 - 1.16 | 1.09        | 0.8 - 1.5    | 0.819   | 0.648 | 0.927 | 0.496 |
| rs1527463    | 1.13        | 0.92 - 1.38 | 1.15        | 0.68 - 1.93  | 0.249   | 0.288 | 0.239 | 0.755 |
| rs1537593    | 0.96        | 0.79 - 1.16 | 1.24        | 0.98 - 1.58  | 0.076   | 0.060 | 0.803 | 0.009 |
| rs1572230    | 0.97        | 0.78 - 1.2  | 0.87        | 0.44 - 1.74  | 0.665   | 0.799 | 0.718 | 0.732 |
| rs17154155   | 1.03        | 0.85 - 1.24 | 1.07        | 0.84 - 1.36  | 0.586   | 0.995 | 0.682 | 0.652 |
| rs17154246   | 1.02        | 0.86 - 1.22 | 1.02        | 0.7 - 1.5    | 0.830   | 0.840 | 0.819 | 0.957 |
| rs1722501    | 0.91        | 0.76 - 1.08 | 1.01        | 0.75 - 1.36  | 0.603   | 0.243 | 0.350 | 0.641 |
| rs1722502    | 0.97        | 0.81 - 1.16 | 1.18        | 0.86 - 1.62  | 0.602   | 0.517 | 0.995 | 0.236 |
| rs1722505    | 0.96        | 0.81 - 1.14 | 1.02        | 0.74 - 1.41  | 0.856   | 0.584 | 0.694 | 0.760 |
| rs17263407   | 1.19        | 0.98 - 1.44 | 1.32        | 0.78 - 2.21  | 0.057   | 0.103 | 0.059 | 0.451 |
| rs17266080   | 1.14        | 0.93 - 1.4  | 1.12        | 0.58 - 2.15  | 0.243   | 0.233 | 0.215 | 0.874 |
| rs1761661    | 0.95        | 0.8 - 1.13  | 1.03        | 0.75 - 1.41  | 0.833   | 0.512 | 0.639 | 0.713 |
| rs1761662    | 0.92        | 0.77 - 1.1  | 1.19        | 0.81 - 1.75  | 0.928   | 0.262 | 0.537 | 0.258 |
| rs1761663    | 1.07        | 0.88 - 1.31 | 1.14        | 0.9 - 1.45   | 0.269   | 0.964 | 0.371 | 0.390 |
| rs1924       | 0.92        | 0.77 - 1.1  | 0.83        | 0.59 - 1.15  | 0.201   | 0.558 | 0.274 | 0.376 |
| rs2366855    | 0.94        | 0.79 - 1.12 | 1.05        | 0.74 - 1.49  | 0.800   | 0.436 | 0.584 | 0.636 |
| rs3173798    | 0.93        | 0.78 - 1.11 | 0.82        | 0.55 - 1.22  | 0.263   | 0.591 | 0.350 | 0.409 |
| rs3173800    | 1.04        | 0.85 - 1.27 | 1.24        | 0.77 - 1.99  | 0.443   | 0.835 | 0.589 | 0.410 |

NOTE.- Heterozygotes (1/2) or minor allele homozygotes (2/2) compared with major allele homozygotes (1/1); OR, odds ratio; 95% C(onfidence) I(nterval); def, both CD36 deficiency alleles pooled; *P*-values for 4 genetic models: Rec(essive), Over(dominant), Dom(inant) and Allelic.

**Table S3D. UNPHASED analysis of pooled Gambian family- and case-control studies (CM) –  
continued.**

| CM<br>Marker | 1/2 vs. 1/1 |             | 2/2 vs. 1/1 |              | Allelic | Over  | Dom   | Rec   |
|--------------|-------------|-------------|-------------|--------------|---------|-------|-------|-------|
|              | OR          | 95% CI      | OR          | 95% CI       |         |       |       |       |
| rs3211810    | 0.99        | 0.82 - 1.21 | 0.80        | 0.45 - 1.42  | 0.660   | 0.964 | 0.823 | 0.453 |
| rs3211817    | 1.13        | 0.9 - 1.43  | 0.38        | 0.11 - 1.25  | 0.791   | 0.217 | 0.452 | 0.082 |
| rs3211821    | 1.02        | 0.85 - 1.22 | 1.09        | 0.77 - 1.53  | 0.682   | 0.958 | 0.782 | 0.667 |
| rs3211822    | 1.12        | 0.93 - 1.35 | 1.07        | 0.83 - 1.38  | 0.435   | 0.267 | 0.246 | 0.940 |
| rs3211828    | 0.93        | 0.78 - 1.1  | 0.74        | 0.52 - 1.06  | 0.111   | 0.679 | 0.239 | 0.148 |
| rs3211842    | 1.03        | 0.86 - 1.22 | 0.85        | 0.65 - 1.12  | 0.420   | 0.392 | 0.929 | 0.163 |
| rs3211849    | 1.01        | 0.83 - 1.22 | 1.03        | 0.81 - 1.31  | 0.801   | 0.924 | 0.891 | 0.795 |
| rs3211850    | 1.02        | 0.84 - 1.25 | 0.74        | 0.42 - 1.3   | 0.700   | 0.675 | 0.994 | 0.268 |
| rs3211867    | 0.88        | 0.74 - 1.06 | 0.79        | 0.6 - 1.03   | 0.057   | 0.485 | 0.099 | 0.206 |
| rs3211869    | 0.93        | 0.77 - 1.11 | 0.77        | 0.52 - 1.16  | 0.185   | 0.596 | 0.294 | 0.276 |
| rs3211870    | 1.12        | 0.92 - 1.36 | 1.21        | 0.95 - 1.53  | 0.118   | 0.802 | 0.173 | 0.277 |
| rs3211883    | 0.91        | 0.76 - 1.08 | 1.16        | 0.89 - 1.51  | 0.693   | 0.098 | 0.537 | 0.095 |
| rs3211886    | 1.04        | 0.84 - 1.29 | 1.19        | 0.67 - 2.1   | 0.572   | 0.804 | 0.662 | 0.594 |
| rs3211888    | 1.10        | 0.83 - 1.47 | 0.50        | 0.11 - 2.22  | 0.813   | 0.459 | 0.624 | 0.331 |
| rs3211897    | 1.18        | 0.87 - 1.6  | -           | -            | 0.593   | 0.198 | 0.356 | 0.071 |
| rs3211899    | 0.91        | 0.72 - 1.16 | 0.99        | 0.43 - 2.28  | 0.506   | 0.453 | 0.465 | 0.949 |
| rs3211909    | 1.04        | 0.86 - 1.27 | 0.60        | 0.33 - 1.11  | 0.602   | 0.485 | 0.957 | 0.085 |
| rs3211911    | 0.89        | 0.65 - 1.21 | 3.87        | 0.95 - 15.73 | 0.913   | 0.400 | 0.636 | 0.037 |
| rs3211913    | 1.00        | 0.84 - 1.2  | 0.83        | 0.63 - 1.1   | 0.339   | 0.539 | 0.756 | 0.157 |
| rs3211923    | 1.07        | 0.7 - 1.64  | 2.01        | 0.2 - 20.78  | 0.642   | 0.762 | 0.697 | 0.560 |
| rs3211928    | 1.17        | 0.98 - 1.41 | 1.12        | 0.75 - 1.67  | 0.144   | 0.102 | 0.088 | 0.915 |
| rs3211930    | 0.79        | 0.57 - 1.09 | -           | -            | 0.072   | 0.188 | 0.116 | 0.142 |
| rs3211931    | 1.11        | 0.93 - 1.32 | 1.29        | 0.9 - 1.85   | 0.119   | 0.411 | 0.174 | 0.270 |
| rs3211942    | 1.14        | 0.89 - 1.47 | 3.10        | 1.21 - 7.9   | 0.067   | 0.372 | 0.157 | 0.018 |
| rs4545029    | 0.91        | 0.76 - 1.09 | 1.15        | 0.82 - 1.63  | 0.916   | 0.213 | 0.487 | 0.261 |
| rs4728191    | 0.94        | 0.77 - 1.15 | 0.82        | 0.46 - 1.45  | 0.394   | 0.612 | 0.469 | 0.543 |
| rs6960369    | 0.90        | 0.76 - 1.07 | 0.88        | 0.66 - 1.18  | 0.249   | 0.359 | 0.216 | 0.679 |
| rs6968407    | 1.11        | 0.92 - 1.32 | 1.48        | 1.05 - 2.09  | 0.041   | 0.622 | 0.135 | 0.047 |
| rs6969989    | 1.18        | 0.99 - 1.42 | 1.36        | 0.86 - 2.13  | 0.045   | 0.111 | 0.049 | 0.347 |
| rs6972923    | 1.09        | 0.89 - 1.32 | 1.15        | 0.9 - 1.47   | 0.252   | 0.873 | 0.321 | 0.410 |
| rs6973242    | 1.08        | 0.9 - 1.29  | 1.41        | 0.99 - 1.99  | 0.087   | 0.759 | 0.231 | 0.077 |
| rs7807607    | 0.94        | 0.79 - 1.12 | 1.02        | 0.74 - 1.4   | 0.735   | 0.430 | 0.538 | 0.730 |
| rs819436     | 0.92        | 0.77 - 1.1  | 1.18        | 0.83 - 1.67  | 0.990   | 0.228 | 0.539 | 0.226 |
| rs9784998    | 0.95        | 0.8 - 1.12  | 0.72        | 0.5 - 1.03   | 0.119   | 0.933 | 0.321 | 0.088 |
| rs997906     | 1.07        | 0.87 - 1.32 | 1.38        | 0.8 - 2.37   | 0.270   | 0.648 | 0.398 | 0.281 |

NOTE.- Heterozygotes (1/2) or minor allele homozygotes (2/2) compared with major allele homozygotes (1/1); OR, odds ratio; 95% C(onfidence) I(nterval); *P*-values for 4 genetic models: Rec(essive), Over(dominant), Dom(inant) and Allelic.



**Table S3E. UNPHASED analysis of pooled Gambian family- and case-control studies (SA).**

| SA<br>Marker | 1/2 vs. 1/1 |             | 2/2 vs. 1/1 |              | Allelic | Over  | Dom   | Rec   |
|--------------|-------------|-------------|-------------|--------------|---------|-------|-------|-------|
|              | OR          | 95% CI      | OR          | 95% CI       |         |       |       |       |
| def          | 1.09        | 0.73 - 1.62 | 3.56        | 0.69 - 18.38 | 0.385   | 0.803 | 0.561 | 0.114 |
| G1439C       | 1.19        | 0.73 - 1.95 | -           | -            | 0.529   | 0.483 | 0.483 | -     |
| T1264G       | 1.09        | 0.59 - 2.02 | -           | -            | 0.563   | 0.902 | 0.718 | 0.083 |
| rs10215288   | 0.91        | 0.73 - 1.14 | 1.18        | 0.81 - 1.73  | 0.893   | 0.26  | 0.627 | 0.244 |
| rs10216184   | 1.10        | 0.87 - 1.37 | 1.44        | 0.9 - 2.32   | 0.159   | 0.658 | 0.292 | 0.176 |
| rs10480808   | 1.19        | 0.93 - 1.52 | 1.18        | 0.88 - 1.59  | 0.255   | 0.338 | 0.15  | 0.749 |
| rs1049654    | 0.96        | 0.76 - 1.2  | 1.13        | 0.83 - 1.53  | 0.564   | 0.376 | 0.937 | 0.26  |
| rs10499857   | 0.98        | 0.79 - 1.21 | 0.89        | 0.56 - 1.43  | 0.688   | 0.951 | 0.787 | 0.656 |
| rs1054516    | 0.89        | 0.72 - 1.1  | 0.98        | 0.64 - 1.5   | 0.449   | 0.271 | 0.311 | 0.843 |
| rs1194178    | 0.88        | 0.7 - 1.1   | 1.06        | 0.63 - 1.77  | 0.495   | 0.239 | 0.325 | 0.647 |
| rs1194180    | 0.94        | 0.76 - 1.18 | 1.32        | 0.89 - 1.96  | 0.539   | 0.347 | 0.92  | 0.106 |
| rs11971740   | 1.08        | 0.87 - 1.33 | 1.01        | 0.7 - 1.46   | 0.696   | 0.462 | 0.524 | 0.827 |
| rs12706912   | 0.91        | 0.74 - 1.13 | 0.74        | 0.52 - 1.04  | 0.093   | 0.861 | 0.224 | 0.134 |
| rs13222488   | 0.99        | 0.8 - 1.24  | 1.27        | 0.83 - 1.94  | 0.526   | 0.71  | 0.846 | 0.248 |
| rs13228738   | 1.14        | 0.9 - 1.44  | 1.00        | 0.51 - 1.96  | 0.375   | 0.256 | 0.286 | 0.846 |
| rs1334511    | 0.98        | 0.79 - 1.23 | 1.02        | 0.72 - 1.45  | 0.991   | 0.836 | 0.919 | 0.86  |
| rs1358337    | 1.03        | 0.83 - 1.28 | 1.02        | 0.74 - 1.39  | 0.881   | 0.822 | 0.82  | 0.98  |
| rs1413659    | 0.92        | 0.74 - 1.15 | 1.30        | 0.87 - 1.95  | 0.668   | 0.267 | 0.764 | 0.116 |
| rs1413661    | 0.90        | 0.73 - 1.11 | 0.93        | 0.64 - 1.37  | 0.443   | 0.377 | 0.35  | 0.958 |
| rs1527463    | 1.01        | 0.78 - 1.3  | 1.51        | 0.75 - 3.05  | 0.552   | 0.902 | 0.791 | 0.241 |
| rs1537593    | 1.11        | 0.87 - 1.43 | 1.10        | 0.81 - 1.48  | 0.551   | 0.545 | 0.396 | 0.919 |
| rs1572230    | 0.81        | 0.62 - 1.07 | 0.61        | 0.21 - 1.81  | 0.091   | 0.163 | 0.112 | 0.453 |
| rs17154155   | 0.85        | 0.67 - 1.07 | 1.00        | 0.75 - 1.34  | 0.897   | 0.1   | 0.29  | 0.346 |
| rs17154246   | 0.99        | 0.8 - 1.22  | 0.83        | 0.54 - 1.28  | 0.523   | 0.899 | 0.747 | 0.389 |
| rs1722501    | 0.86        | 0.69 - 1.07 | 1.16        | 0.8 - 1.69   | 0.827   | 0.097 | 0.326 | 0.206 |
| rs1722502    | 0.88        | 0.71 - 1.1  | 0.96        | 0.66 - 1.41  | 0.457   | 0.267 | 0.299 | 0.865 |
| rs1722505    | 0.89        | 0.72 - 1.1  | 0.98        | 0.67 - 1.43  | 0.494   | 0.258 | 0.313 | 0.789 |
| rs17263407   | 1.13        | 0.89 - 1.43 | 1.16        | 0.63 - 2.14  | 0.313   | 0.355 | 0.3   | 0.767 |
| rs17266080   | 1.03        | 0.8 - 1.33  | 1.41        | 0.68 - 2.95  | 0.528   | 0.901 | 0.681 | 0.369 |
| rs1761661    | 0.88        | 0.71 - 1.09 | 1.00        | 0.69 - 1.45  | 0.527   | 0.207 | 0.294 | 0.665 |
| rs1761662    | 0.88        | 0.71 - 1.1  | 0.89        | 0.54 - 1.49  | 0.297   | 0.292 | 0.255 | 0.847 |
| rs1761663    | 0.96        | 0.76 - 1.22 | 1.12        | 0.84 - 1.49  | 0.477   | 0.365 | 0.989 | 0.25  |
| rs1924       | 1.02        | 0.83 - 1.26 | 0.82        | 0.53 - 1.26  | 0.657   | 0.604 | 0.995 | 0.304 |
| rs2366855    | 0.93        | 0.75 - 1.16 | 0.99        | 0.66 - 1.48  | 0.671   | 0.518 | 0.555 | 0.902 |
| rs3173798    | 1.02        | 0.82 - 1.26 | 0.67        | 0.4 - 1.12   | 0.424   | 0.562 | 0.854 | 0.101 |
| rs3173800    | 1.02        | 0.8 - 1.3   | 1.01        | 0.54 - 1.89  | 0.871   | 0.852 | 0.854 | 0.997 |

NOTE.- Heterozygotes (1/2) or minor allele homozygotes (2/2) compared with major allele homozygotes (1/1); OR, odds ratio; 95% C(onfidence) I(nterval); def, both CD36 deficiency alleles pooled; *P*-values for 4 genetic models: Rec(essive), Over(dominant), Dom(inant) and Allelic.

**Table S3F. UNPHASED analysis of pooled Gambian family- and case-control studies (SA) –  
continued.**

| SA<br>Marker | 1/2 vs. 1/1 |             | 2/2 vs. 1/1 |             | Allelic | Over  | Dom   | Rec   |
|--------------|-------------|-------------|-------------|-------------|---------|-------|-------|-------|
|              | OR          | 95% CI      | OR          | 95% CI      |         |       |       |       |
| rs3211810    | 1.04        | 0.82 - 1.32 | 0.93        | 0.44 - 1.96 | 0.852   | 0.716 | 0.777 | 0.807 |
| rs3211817    | 1.20        | 0.9 - 1.58  | 0.66        | 0.22 - 1.96 | 0.46    | 0.177 | 0.285 | 0.374 |
| rs3211821    | 0.98        | 0.79 - 1.22 | 0.94        | 0.61 - 1.44 | 0.763   | 0.927 | 0.817 | 0.793 |
| rs3211822    | 0.99        | 0.79 - 1.23 | 1.06        | 0.77 - 1.45 | 0.811   | 0.77  | 0.996 | 0.661 |
| rs3211828    | 1.04        | 0.84 - 1.29 | 0.73        | 0.46 - 1.15 | 0.56    | 0.415 | 0.95  | 0.126 |
| rs3211842    | 1.01        | 0.81 - 1.25 | 0.91        | 0.66 - 1.26 | 0.653   | 0.733 | 0.902 | 0.505 |
| rs3211849    | 0.83        | 0.66 - 1.05 | 0.97        | 0.73 - 1.3  | 0.698   | 0.079 | 0.191 | 0.414 |
| rs3211850    | 0.98        | 0.76 - 1.26 | 1.62        | 0.82 - 3.2  | 0.59    | 0.721 | 0.905 | 0.151 |
| rs3211867    | 1.11        | 0.89 - 1.39 | 0.76        | 0.53 - 1.08 | 0.427   | 0.07  | 0.66  | 0.033 |
| rs3211869    | 1.03        | 0.83 - 1.27 | 0.78        | 0.46 - 1.31 | 0.713   | 0.636 | 0.983 | 0.309 |
| rs3211870    | 1.17        | 0.92 - 1.49 | 1.02        | 0.75 - 1.39 | 0.84    | 0.131 | 0.289 | 0.428 |
| rs3211883    | 0.92        | 0.74 - 1.15 | 0.91        | 0.65 - 1.26 | 0.454   | 0.6   | 0.433 | 0.75  |
| rs3211886    | 1.02        | 0.79 - 1.33 | 1.03        | 0.47 - 2.24 | 0.866   | 0.877 | 0.865 | 0.963 |
| rs3211888    | 0.99        | 0.71 - 1.4  | 0.67        | 0.19 - 2.37 | 0.754   | 0.969 | 0.883 | 0.533 |
| rs3211897    | 1.26        | 0.87 - 1.83 | -           | -           | 0.49    | 0.231 | 0.336 | 0.205 |
| rs3211899    | 0.63        | 0.46 - 0.86 | 1.49        | 0.51 - 4.35 | 0.018   | 0.002 | 0.006 | 0.251 |
| rs3211909    | 0.89        | 0.69 - 1.14 | 0.94        | 0.5 - 1.77  | 0.41    | 0.364 | 0.361 | 0.969 |
| rs3211911    | 0.88        | 0.59 - 1.33 | -           | -           | 0.372   | 0.585 | 0.467 | 0.251 |
| rs3211913    | 1.08        | 0.87 - 1.33 | 0.86        | 0.62 - 1.21 | 0.712   | 0.248 | 0.714 | 0.213 |
| rs3211923    | 0.96        | 0.62 - 1.49 | -           | -           | 0.726   | 0.896 | 0.807 | 0.426 |
| rs3211928    | 0.98        | 0.78 - 1.23 | 0.84        | 0.5 - 1.41  | 0.614   | 0.99  | 0.757 | 0.52  |
| rs3211930    | 0.92        | 0.62 - 1.34 | -           | -           | 0.502   | 0.663 | 0.575 | 0.358 |
| rs3211931    | 1.02        | 0.82 - 1.27 | 1.05        | 0.66 - 1.67 | 0.803   | 0.884 | 0.823 | 0.87  |
| rs3211942    | 0.94        | 0.7 - 1.28  | 0.53        | 0.12 - 2.35 | 0.502   | 0.76  | 0.614 | 0.41  |
| rs4545029    | 0.83        | 0.66 - 1.03 | 0.93        | 0.6 - 1.46  | 0.198   | 0.096 | 0.107 | 0.891 |
| rs4728191    | 0.87        | 0.67 - 1.11 | 0.59        | 0.24 - 1.43 | 0.13    | 0.329 | 0.192 | 0.291 |
| rs6960369    | 1.11        | 0.89 - 1.37 | 1.11        | 0.78 - 1.59 | 0.413   | 0.454 | 0.348 | 0.821 |
| rs6968407    | 0.97        | 0.78 - 1.2  | 1.36        | 0.89 - 2.07 | 0.485   | 0.474 | 0.953 | 0.112 |
| rs6969989    | 1.13        | 0.91 - 1.41 | 0.96        | 0.55 - 1.67 | 0.477   | 0.243 | 0.313 | 0.668 |
| rs6972923    | 0.95        | 0.75 - 1.2  | 1.09        | 0.81 - 1.46 | 0.606   | 0.356 | 0.883 | 0.315 |
| rs6973242    | 0.99        | 0.8 - 1.23  | 1.25        | 0.82 - 1.91 | 0.561   | 0.675 | 0.889 | 0.259 |
| rs7807607    | 0.85        | 0.69 - 1.05 | 1.03        | 0.71 - 1.5  | 0.467   | 0.107 | 0.201 | 0.511 |
| rs819436     | 0.81        | 0.66 - 1.01 | 1.19        | 0.77 - 1.84 | 0.404   | 0.033 | 0.119 | 0.208 |
| rs9784998    | 1.01        | 0.82 - 1.25 | 0.74        | 0.47 - 1.16 | 0.459   | 0.615 | 0.848 | 0.164 |
| rs997906     | 0.94        | 0.72 - 1.22 | 0.88        | 0.42 - 1.84 | 0.594   | 0.684 | 0.617 | 0.797 |

NOTE.- Heterozygotes (1/2) or minor allele homozygotes (2/2) compared with major allele homozygotes (1/1) ; OR, odds ratio; 95% C(onfidence) I(nterval); *P*-values for 4 genetic models: Rec(essive), Over(dominant),, Dom(inant) and Allelic.

**Table S4. 54 SNPs genotyped and analyzed in the HGDP-CEPH Diversity Panel.**

| SNP        | Coord    | Success | SNP        | Coord    | Success |
|------------|----------|---------|------------|----------|---------|
| rs4731338  | 79779138 | 96.9%   | rs1405745  | 80146176 | 100.0%  |
| rs304753   | 79820301 | 97.6%   | rs1527480  | 80155968 | 97.6%   |
| rs304775   | 79841610 | 99.4%   | rs12534038 | 80167036 | 97.4%   |
| rs1878314  | 79861553 | 91.3%   | rs6958863  | 80177838 | 99.8%   |
| rs568125   | 79882207 | 97.8%   | rs2366858  | 80178558 | 97.3%   |
| rs704871   | 79903613 | 95.9%   | rs954409   | 80189667 | 98.7%   |
| rs2944398  | 79924797 | 97.6%   | rs1880957  | 80192165 | 98.6%   |
| rs6467192  | 79945734 | 95.2%   | rs1527467  | 80197742 | 99.8%   |
| rs10216027 | 79968467 | 96.4%   | rs1852538  | 80202937 | 90.0%   |
| rs2103134  | 79997284 | 88.8%   | rs1527470  | 80208765 | 90.6%   |
| rs1931694  | 80009513 | 97.7%   | rs1405743  | 80216084 | 95.6%   |
| rs1851937  | 80028981 | 97.2%   | rs10246081 | 80228534 | 97.1%   |
| rs2065668  | 80058544 | 99.1%   | rs12669309 | 80238106 | 94.6%   |
| rs1722505  | 80078625 | 94.8%   | rs3807103  | 80249157 | 96.6%   |
| rs10499859 | 80096746 | 96.6%   | rs12673477 | 80268683 | 94.3%   |
| rs13306227 | 80114006 | 98.5%   | rs6467405  | 80274281 | 97.4%   |
| rs1527463  | 80114267 | 99.8%   | rs17154508 | 80289376 | 95.8%   |
| rs3211810  | 80114953 | 99.8%   | rs10487878 | 80298261 | 99.1%   |
| rs3211828  | 80117539 | 99.7%   | rs4731861  | 80309471 | 96.5%   |
| rs3211842  | 80120572 | 95.2%   | rs7795137  | 80328382 | 97.4%   |
| rs3765187  | 80123939 | 99.9%   | rs7784762  | 80334149 | 99.0%   |
| rs5957     | 80130272 | 97.4%   | rs7779029  | 80370048 | 95.4%   |
| rs3211917  | 80133237 | 99.2%   | rs2057880  | 80387869 | 87.6%   |
| rs3211938  | 80138385 | 99.8%   | rs17154598 | 80404725 | 96.4%   |
| rs3211949  | 80140136 | 95.9%   | rs740210   | 80425673 | 94.8%   |
| rs1803256  | 80141286 | 96.7%   | rs2367090  | 80447883 | 97.2%   |
| rs7755     | 80144207 | 98.9%   | rs701327   | 80474845 | 98.8%   |

NOTE.- SNP, dbSNP reference SNP identifier; Coord, chromosome 7 coordinate values from NCBI build 36/dbSNP 126; Genotyping success rate in the 974 individuals used for our population genetic analysis.

**Table S5. Sample sizes and demographics by study design and region of origin.**

| Study Site               | Samples  | Size | Male (%) | Mean Age (Months) | Ethnic Groups                                            |
|--------------------------|----------|------|----------|-------------------|----------------------------------------------------------|
| Population-based studies |          |      |          |                   |                                                          |
| Gambia                   | Cases    | 727  | 50.8     | 52.1              | 106 Fula, 183 Jola, 274 Mandinka, 80 Wolloff, 84 Other   |
|                          | Controls | 623  | 50.1     | 0                 | 136 Fula, 89 Jola, 173 Mandinka, 94 Wolloff, 131 Other   |
| Malawi                   | Cases    | 718  | 49.3     | 42.1              | *                                                        |
|                          | Controls | 405  | 52.2     | 0                 |                                                          |
| Kenya                    | Cases    | 708  | 55.1     | 30.3              | 108 Chonyi, 320 Giriama, 41 Kauma, 239 other             |
|                          | Controls | 902  | 51.6     | 0                 | 183 Chonyi, 405 Giriama, 55 Kauma, 259 other             |
| Ghana                    | Cases    | 792  | 57.4     | 18.5              | 435 Kasem, 305 Nankan, 28 Buli, 28 other                 |
|                          | Controls | 806  | 56.3     | 20.5              | 508 Kasem, 269 Nankan, 15 Buli, 14 other                 |
| Family-based studies     |          |      |          |                   |                                                          |
| Gambia                   | Trios    | 1288 | 54.0     | 47.7              | 189 Fula, 216 Jola, 526 Mandinka, 174 Wolloff, 183 Other |
| Malawi                   | Trios    | 225  | 54.7     | 38.5              | *                                                        |
| Kenya                    | Trios    | 234  | 48.1     | 29.8              | 51 Chonyi, 134 Giriama, 15 Kauma, 34 other               |

NOTE.- Apart from the Ghanaians, all controls are cord blood samples are therefore from children age zero. \*Malawians in the study region are considered relatively ethnically homogenous; therefore no ethnicity information was gathered. Gender (% male) and mean age of probands are reported.

**Table S6A. CD36 genotyping assay performance (Gambian case-control study).**

| Marker     | Controls |     |     |       |         | HWE<br><i>P</i> | Cases |     |     |       |         |
|------------|----------|-----|-----|-------|---------|-----------------|-------|-----|-----|-------|---------|
|            | 1/1      | 1/2 | 2/2 | Freq  | Success |                 | 1/1   | 1/2 | 2/2 | Freq  | Success |
| G1439C     | 594      | 22  | 0   | 0.018 | 98.9%   | 0.493           | 706   | 17  | 1   | 0.013 | 99.6%   |
| T1264G     | 595      | 24  | 0   | 0.019 | 99.4%   | 0.579           | 706   | 20  | 0   | 0.014 | 99.9%   |
| rs10215288 | 317      | 247 | 56  | 0.290 | 99.5%   | 0.478           | 371   | 267 | 79  | 0.296 | 98.6%   |
| rs10216184 | 383      | 207 | 29  | 0.214 | 99.4%   | 0.952           | 446   | 243 | 34  | 0.215 | 99.4%   |
| rs10480808 | 189      | 284 | 148 | 0.467 | 99.7%   | 0.049           | 191   | 371 | 161 | 0.479 | 99.4%   |
| rs1049654  | 251      | 279 | 88  | 0.368 | 99.2%   | 0.503           | 255   | 338 | 130 | 0.414 | 99.4%   |
| rs10499857 | 376      | 213 | 31  | 0.222 | 99.5%   | 0.972           | 448   | 243 | 31  | 0.211 | 99.3%   |
| rs1054516  | 380      | 209 | 31  | 0.219 | 99.5%   | 0.818           | 427   | 251 | 45  | 0.236 | 99.4%   |
| rs1194178  | 409      | 191 | 21  | 0.188 | 99.7%   | 0.906           | 482   | 211 | 30  | 0.187 | 99.4%   |
| rs1194180  | 353      | 223 | 47  | 0.254 | 100.0%  | 0.185           | 404   | 260 | 61  | 0.263 | 99.7%   |
| rs11971740 | 298      | 267 | 54  | 0.303 | 99.4%   | 0.647           | 347   | 302 | 73  | 0.310 | 99.3%   |
| rs12706912 | 251      | 279 | 90  | 0.370 | 99.5%   | 0.422           | 306   | 327 | 92  | 0.352 | 99.7%   |
| rs13222488 | 343      | 250 | 28  | 0.246 | 99.7%   | 0.045           | 420   | 256 | 46  | 0.241 | 99.3%   |
| rs13228738 | 442      | 163 | 16  | 0.157 | 99.7%   | 0.932           | 523   | 183 | 19  | 0.152 | 99.7%   |
| rs1334511  | 302      | 241 | 62  | 0.302 | 97.1%   | 0.206           | 353   | 268 | 89  | 0.314 | 97.7%   |
| rs1358337  | 212      | 300 | 107 | 0.415 | 99.4%   | 0.980           | 253   | 344 | 128 | 0.414 | 99.7%   |
| rs1413659  | 348      | 215 | 46  | 0.252 | 97.8%   | 0.138           | 396   | 255 | 59  | 0.263 | 97.7%   |
| rs1413661  | 326      | 253 | 41  | 0.270 | 99.5%   | 0.433           | 378   | 280 | 63  | 0.282 | 99.2%   |
| rs1527463  | 474      | 134 | 13  | 0.129 | 99.7%   | 0.421           | 546   | 158 | 20  | 0.137 | 99.6%   |
| rs1537593  | 150      | 309 | 162 | 0.510 | 99.7%   | 0.956           | 181   | 350 | 191 | 0.507 | 99.3%   |
| rs1572230  | 478      | 130 | 13  | 0.126 | 99.7%   | 0.313           | 585   | 129 | 8   | 0.100 | 99.3%   |
| rs17154155 | 171      | 313 | 136 | 0.472 | 99.5%   | 0.794           | 219   | 354 | 150 | 0.452 | 99.4%   |
| rs17154246 | 373      | 204 | 45  | 0.236 | 99.8%   | 0.029           | 422   | 265 | 38  | 0.235 | 99.7%   |
| rs1722501  | 329      | 243 | 48  | 0.273 | 99.5%   | 0.798           | 396   | 250 | 77  | 0.279 | 99.4%   |
| rs1722502  | 320      | 248 | 44  | 0.275 | 98.2%   | 0.727           | 371   | 274 | 67  | 0.287 | 97.9%   |
| rs1722505  | 325      | 253 | 41  | 0.271 | 99.4%   | 0.424           | 380   | 282 | 62  | 0.280 | 99.6%   |
| rs17263407 | 416      | 180 | 20  | 0.179 | 98.9%   | 0.971           | 494   | 205 | 24  | 0.175 | 99.4%   |
| rs17266080 | 466      | 143 | 11  | 0.133 | 99.5%   | 0.880           | 538   | 172 | 10  | 0.133 | 99.0%   |
| rs1761661  | 318      | 260 | 43  | 0.279 | 99.7%   | 0.338           | 375   | 287 | 64  | 0.286 | 99.9%   |
| rs1761662  | 395      | 205 | 22  | 0.200 | 99.8%   | 0.531           | 454   | 240 | 31  | 0.208 | 99.7%   |
| rs1761663  | 156      | 318 | 148 | 0.494 | 99.8%   | 0.613           | 194   | 345 | 186 | 0.494 | 99.7%   |
| rs1924     | 337      | 239 | 45  | 0.265 | 99.7%   | 0.832           | 400   | 277 | 46  | 0.255 | 99.4%   |
| rs2366855  | 362      | 214 | 40  | 0.239 | 98.9%   | 0.317           | 425   | 245 | 50  | 0.240 | 99.0%   |
| rs3173798  | 374      | 212 | 35  | 0.227 | 99.7%   | 0.556           | 454   | 240 | 28  | 0.205 | 99.3%   |
| rs3173800  | 456      | 147 | 18  | 0.147 | 99.7%   | 0.192           | 530   | 174 | 21  | 0.149 | 99.7%   |
| rs3211810  | 476      | 129 | 16  | 0.130 | 99.7%   | 0.068           | 533   | 170 | 21  | 0.146 | 99.6%   |

NOTE.- Genotype counts for major allele homozygotes (1/1), heterozygotes (1/2) and minor allele homozygotes (2/2); Freq, minor allele frequency; Success, percentage genotyping success; HWE, exact test Hardy-Weinberg equilibrium *P*-value (controls only).

**Table S6B. CD36 genotyping assay performance (Gambian case-control study) – continued.**

| Marker    | Controls |     |     |       |         | HWE<br><i>P</i> | Cases |     |     |       |         |
|-----------|----------|-----|-----|-------|---------|-----------------|-------|-----|-----|-------|---------|
|           | 1/1      | 1/2 | 2/2 | Freq  | Success |                 | 1/1   | 1/2 | 2/2 | Freq  | Success |
| rs3211817 | 512      | 96  | 11  | 0.095 | 99.4%   | 0.022           | 596   | 125 | 3   | 0.090 | 99.6%   |
| rs3211821 | 359      | 226 | 32  | 0.235 | 99.0%   | 0.708           | 409   | 258 | 45  | 0.244 | 97.9%   |
| rs3211822 | 219      | 285 | 108 | 0.409 | 98.2%   | 0.395           | 258   | 324 | 135 | 0.414 | 98.6%   |
| rs3211828 | 358      | 217 | 41  | 0.243 | 98.9%   | 0.345           | 429   | 260 | 31  | 0.224 | 99.0%   |
| rs3211842 | 258      | 262 | 101 | 0.374 | 99.7%   | 0.017           | 302   | 338 | 85  | 0.350 | 99.7%   |
| rs3211849 | 179      | 305 | 135 | 0.464 | 99.4%   | 0.859           | 197   | 355 | 170 | 0.481 | 99.3%   |
| rs3211850 | 492      | 115 | 14  | 0.115 | 99.7%   | 0.036           | 541   | 166 | 17  | 0.138 | 99.6%   |
| rs3211867 | 278      | 261 | 81  | 0.341 | 99.5%   | 0.130           | 307   | 329 | 79  | 0.341 | 98.3%   |
| rs3211869 | 379      | 208 | 34  | 0.222 | 99.7%   | 0.497           | 456   | 239 | 28  | 0.204 | 99.4%   |
| rs3211870 | 159      | 303 | 156 | 0.498 | 99.2%   | 0.673           | 184   | 363 | 175 | 0.494 | 99.3%   |
| rs3211883 | 276      | 270 | 76  | 0.339 | 99.8%   | 0.470           | 326   | 303 | 95  | 0.340 | 99.6%   |
| rs3211886 | 477      | 134 | 12  | 0.127 | 100.0%  | 0.577           | 563   | 143 | 16  | 0.121 | 99.3%   |
| rs3211888 | 557      | 56  | 6   | 0.055 | 99.4%   | 0.005           | 667   | 55  | 3   | 0.042 | 99.7%   |
| rs3211897 | 569      | 50  | 2   | 0.043 | 99.7%   | 0.733           | 656   | 69  | 0   | 0.048 | 99.7%   |
| rs3211899 | 508      | 110 | 3   | 0.093 | 99.7%   | 0.353           | 607   | 110 | 8   | 0.087 | 99.7%   |
| rs3211909 | 454      | 145 | 22  | 0.152 | 99.7%   | 0.025           | 524   | 180 | 18  | 0.150 | 99.3%   |
| rs3211911 | 552      | 62  | 3   | 0.055 | 99.0%   | 0.612           | 664   | 57  | 3   | 0.044 | 99.6%   |
| rs3211913 | 268      | 262 | 91  | 0.357 | 99.7%   | 0.049           | 296   | 345 | 83  | 0.353 | 99.6%   |
| rs3211923 | 582      | 35  | 2   | 0.032 | 99.4%   | 0.234           | 691   | 32  | 0   | 0.022 | 99.4%   |
| rs3211928 | 344      | 236 | 37  | 0.251 | 99.0%   | 0.742           | 364   | 288 | 41  | 0.267 | 95.3%   |
| rs3211930 | 559      | 61  | 1   | 0.051 | 99.7%   | 0.905           | 674   | 51  | 1   | 0.037 | 99.9%   |
| rs3211931 | 348      | 236 | 39  | 0.252 | 100.0%  | 0.966           | 378   | 296 | 51  | 0.274 | 99.7%   |
| rs3211942 | 528      | 82  | 8   | 0.079 | 99.2%   | 0.044           | 595   | 118 | 7   | 0.092 | 99.0%   |
| rs4545029 | 367      | 222 | 31  | 0.229 | 99.5%   | 0.799           | 446   | 233 | 44  | 0.222 | 99.4%   |
| rs4728191 | 453      | 143 | 24  | 0.154 | 99.5%   | 0.006           | 564   | 148 | 13  | 0.120 | 99.7%   |
| rs6960369 | 277      | 286 | 60  | 0.326 | 100.0%  | 0.294           | 321   | 314 | 85  | 0.336 | 99.0%   |
| rs6968407 | 343      | 249 | 30  | 0.248 | 99.8%   | 0.087           | 420   | 255 | 52  | 0.247 | 100.0%  |
| rs6969989 | 361      | 230 | 17  | 0.217 | 97.6%   | 0.007           | 433   | 252 | 19  | 0.206 | 96.8%   |
| rs6972923 | 154      | 313 | 147 | 0.494 | 98.6%   | 0.669           | 193   | 338 | 183 | 0.493 | 98.2%   |
| rs6973242 | 343      | 248 | 30  | 0.248 | 99.7%   | 0.094           | 422   | 257 | 48  | 0.243 | 100.0%  |
| rs7807607 | 322      | 248 | 42  | 0.271 | 98.2%   | 0.591           | 386   | 269 | 62  | 0.274 | 98.6%   |
| rs819436  | 389      | 205 | 28  | 0.210 | 99.8%   | 0.955           | 451   | 229 | 41  | 0.216 | 99.2%   |
| rs9784998 | 370      | 213 | 37  | 0.231 | 99.5%   | 0.446           | 429   | 264 | 30  | 0.224 | 99.4%   |
| rs997906  | 454      | 151 | 13  | 0.143 | 99.2%   | 0.959           | 535   | 164 | 19  | 0.141 | 98.8%   |

NOTE.- Genotype counts for major allele homozygotes (1/1), heterozygotes (1/2) and minor allele homozygotes (2/2); Freq, minor allele frequency; Success, percentage genotyping success; HWE, exact test Hardy-Weinberg equilibrium *P*-value (controls only).

**Table S6C. CD36 genotyping assay performance (Gambian family study).**

| Marker     | Parents |      |     |       |         | Cases |     |     |       |         |
|------------|---------|------|-----|-------|---------|-------|-----|-----|-------|---------|
|            | 1/1     | 1/2  | 2/2 | Freq  | Success | 1/1   | 1/2 | 2/2 | Freq  | Success |
| G1439C     | 2454    | 110  | 7   | 0.024 | 99.8%   | 1220  | 65  | 2   | 0.027 | 99.9%   |
| T1264G     | 2496    | 77   | 1   | 0.015 | 99.9%   | 1248  | 36  | 1   | 0.015 | 99.8%   |
| rs10215288 | 1249    | 1031 | 213 | 0.292 | 96.8%   | 643   | 507 | 110 | 0.288 | 97.8%   |
| rs10216184 | 1714    | 766  | 87  | 0.183 | 99.7%   | 858   | 382 | 41  | 0.181 | 99.5%   |
| rs10480808 | 751     | 1262 | 539 | 0.458 | 99.1%   | 371   | 629 | 284 | 0.466 | 99.7%   |
| rs1049654  | 869     | 1248 | 435 | 0.415 | 99.1%   | 442   | 620 | 218 | 0.413 | 99.4%   |
| rs10499857 | 1520    | 907  | 143 | 0.232 | 99.8%   | 744   | 475 | 67  | 0.237 | 99.8%   |
| rs1054516  | 1462    | 969  | 143 | 0.244 | 99.9%   | 748   | 454 | 85  | 0.242 | 99.9%   |
| rs1194178  | 1638    | 835  | 86  | 0.197 | 99.3%   | 830   | 392 | 56  | 0.197 | 99.2%   |
| rs1194180  | 1390    | 993  | 182 | 0.265 | 99.6%   | 717   | 483 | 87  | 0.255 | 99.9%   |
| rs11971740 | 1216    | 1087 | 248 | 0.310 | 99.0%   | 615   | 547 | 121 | 0.307 | 99.6%   |
| rs12706912 | 1066    | 1162 | 342 | 0.359 | 99.8%   | 540   | 580 | 167 | 0.355 | 99.9%   |
| rs13222488 | 1560    | 881  | 126 | 0.221 | 99.7%   | 780   | 430 | 75  | 0.226 | 99.8%   |
| rs13228738 | 1942    | 591  | 41  | 0.131 | 99.9%   | 967   | 293 | 27  | 0.135 | 99.9%   |
| rs1334511  | 1210    | 969  | 363 | 0.333 | 98.7%   | 610   | 482 | 190 | 0.336 | 99.5%   |
| rs1358337  | 901     | 1246 | 424 | 0.407 | 99.8%   | 450   | 623 | 212 | 0.407 | 99.8%   |
| rs1413659  | 1386    | 960  | 181 | 0.262 | 98.1%   | 713   | 479 | 86  | 0.255 | 99.2%   |
| rs1413661  | 1295    | 1105 | 173 | 0.282 | 99.9%   | 669   | 511 | 108 | 0.282 | 100.0%  |
| rs1527463  | 1993    | 529  | 46  | 0.121 | 99.7%   | 992   | 271 | 20  | 0.121 | 99.6%   |
| rs1537593  | 692     | 1267 | 611 | 0.484 | 99.8%   | 346   | 628 | 313 | 0.487 | 99.9%   |
| rs1572230  | 2038    | 489  | 36  | 0.109 | 99.5%   | 1034  | 234 | 16  | 0.104 | 99.7%   |
| rs17154155 | 778     | 1254 | 541 | 0.454 | 99.9%   | 388   | 606 | 293 | 0.463 | 99.9%   |
| rs17154246 | 1543    | 897  | 123 | 0.223 | 99.5%   | 785   | 432 | 70  | 0.222 | 99.9%   |
| rs1722501  | 1349    | 1008 | 217 | 0.280 | 99.9%   | 673   | 520 | 94  | 0.275 | 99.9%   |
| rs1722502  | 1265    | 1061 | 174 | 0.282 | 97.0%   | 661   | 499 | 107 | 0.281 | 98.4%   |
| rs1722505  | 1303    | 1097 | 173 | 0.280 | 99.9%   | 673   | 504 | 106 | 0.279 | 99.6%   |
| rs17263407 | 1851    | 636  | 49  | 0.145 | 98.4%   | 925   | 312 | 28  | 0.145 | 98.2%   |
| rs17266080 | 1934    | 552  | 66  | 0.134 | 99.1%   | 942   | 301 | 36  | 0.146 | 99.3%   |
| rs1761661  | 1285    | 1101 | 183 | 0.286 | 99.7%   | 664   | 511 | 111 | 0.285 | 99.8%   |
| rs1761662  | 1595    | 872  | 100 | 0.209 | 99.7%   | 813   | 415 | 59  | 0.207 | 99.9%   |
| rs1761663  | 683     | 1327 | 559 | 0.476 | 99.7%   | 350   | 653 | 283 | 0.474 | 99.8%   |
| rs1924     | 1364    | 997  | 197 | 0.272 | 99.3%   | 693   | 493 | 98  | 0.268 | 99.7%   |
| rs2366855  | 1416    | 981  | 141 | 0.249 | 98.5%   | 725   | 464 | 83  | 0.248 | 98.8%   |
| rs3173798  | 1543    | 879  | 131 | 0.223 | 99.1%   | 771   | 438 | 74  | 0.228 | 99.6%   |
| rs3173800  | 1922    | 598  | 47  | 0.135 | 99.7%   | 977   | 280 | 30  | 0.132 | 99.9%   |
| rs3211810  | 1854    | 669  | 50  | 0.149 | 99.9%   | 919   | 348 | 19  | 0.150 | 99.8%   |

NOTE.- Genotype counts for major allele homozygotes (1/1), heterozygotes (1/2) and minor allele homozygotes (2/2); Freq, minor allele frequency; Success, percentage genotyping success; HWE, exact test Hardy-Weinberg equilibrium *P*-value (controls only).

**Table S6D. CD36 genotyping assay performance (Gambian family study) – continued.**

| Marker    | Parents |      |     |       |         | Cases |     |     |       |         |
|-----------|---------|------|-----|-------|---------|-------|-----|-----|-------|---------|
|           | 1/1     | 1/2  | 2/2 | Freq  | Success | 1/1   | 1/2 | 2/2 | Freq  | Success |
| rs3211817 | 2159    | 394  | 17  | 0.083 | 99.8%   | 1076  | 198 | 14  | 0.088 | 100.0%  |
| rs3211821 | 1427    | 947  | 171 | 0.253 | 98.8%   | 719   | 478 | 84  | 0.252 | 99.5%   |
| rs3211822 | 959     | 1217 | 381 | 0.387 | 99.3%   | 464   | 630 | 180 | 0.389 | 98.9%   |
| rs3211828 | 1456    | 961  | 154 | 0.247 | 99.8%   | 728   | 474 | 83  | 0.249 | 99.8%   |
| rs3211842 | 1054    | 1170 | 330 | 0.358 | 99.1%   | 535   | 576 | 176 | 0.361 | 99.9%   |
| rs3211849 | 702     | 1286 | 584 | 0.477 | 99.8%   | 356   | 631 | 296 | 0.477 | 99.6%   |
| rs3211850 | 1929    | 596  | 50  | 0.135 | 100.0%  | 955   | 307 | 22  | 0.137 | 99.7%   |
| rs3211867 | 1042    | 1157 | 325 | 0.358 | 98.0%   | 542   | 559 | 176 | 0.357 | 99.1%   |
| rs3211869 | 1547    | 873  | 128 | 0.222 | 98.9%   | 775   | 434 | 71  | 0.225 | 99.4%   |
| rs3211870 | 683     | 1276 | 606 | 0.485 | 99.6%   | 334   | 640 | 310 | 0.491 | 99.7%   |
| rs3211883 | 1136    | 1137 | 294 | 0.336 | 99.7%   | 588   | 519 | 171 | 0.337 | 99.2%   |
| rs3211886 | 2033    | 497  | 29  | 0.108 | 99.3%   | 1027  | 237 | 18  | 0.106 | 99.5%   |
| rs3211888 | 2315    | 255  | 5   | 0.051 | 100.0%  | 1149  | 133 | 5   | 0.056 | 99.9%   |
| rs3211897 | 2358    | 204  | 13  | 0.045 | 100.0%  | 1175  | 110 | 0   | 0.043 | 99.8%   |
| rs3211899 | 2173    | 382  | 19  | 0.082 | 99.9%   | 1102  | 175 | 10  | 0.076 | 99.9%   |
| rs3211909 | 1869    | 617  | 51  | 0.142 | 98.5%   | 930   | 323 | 23  | 0.145 | 99.1%   |
| rs3211911 | 2338    | 189  | 9   | 0.041 | 98.4%   | 1181  | 92  | 3   | 0.038 | 99.1%   |
| rs3211913 | 1104    | 1136 | 290 | 0.339 | 98.2%   | 570   | 573 | 138 | 0.331 | 99.5%   |
| rs3211923 | 2440    | 112  | 2   | 0.023 | 99.1%   | 1225  | 61  | 1   | 0.024 | 99.9%   |
| rs3211928 | 1384    | 833  | 119 | 0.229 | 90.7%   | 686   | 450 | 42  | 0.227 | 91.5%   |
| rs3211930 | 2370    | 201  | 2   | 0.040 | 99.9%   | 1189  | 97  | 0   | 0.038 | 99.8%   |
| rs3211931 | 1502    | 901  | 151 | 0.236 | 99.1%   | 744   | 480 | 56  | 0.231 | 99.4%   |
| rs3211942 | 2240    | 309  | 7   | 0.063 | 99.2%   | 1137  | 141 | 6   | 0.060 | 99.7%   |
| rs4545029 | 1528    | 913  | 131 | 0.228 | 99.8%   | 773   | 443 | 71  | 0.227 | 99.9%   |
| rs4728191 | 1946    | 571  | 51  | 0.131 | 99.7%   | 982   | 284 | 20  | 0.126 | 99.8%   |
| rs6960369 | 1102    | 1119 | 307 | 0.343 | 98.1%   | 560   | 563 | 153 | 0.341 | 99.1%   |
| rs6968407 | 1562    | 874  | 126 | 0.220 | 99.5%   | 781   | 427 | 77  | 0.226 | 99.8%   |
| rs6969989 | 1638    | 814  | 72  | 0.190 | 98.0%   | 819   | 405 | 43  | 0.194 | 98.4%   |
| rs6972923 | 681     | 1309 | 554 | 0.475 | 98.8%   | 347   | 643 | 283 | 0.475 | 98.8%   |
| rs6973242 | 1555    | 880  | 128 | 0.222 | 99.5%   | 779   | 431 | 76  | 0.227 | 99.8%   |
| rs7807607 | 1288    | 1057 | 168 | 0.277 | 97.6%   | 661   | 497 | 106 | 0.280 | 98.1%   |
| rs819436  | 1524    | 935  | 104 | 0.223 | 99.5%   | 774   | 436 | 76  | 0.229 | 99.8%   |
| rs9784998 | 1448    | 974  | 150 | 0.248 | 99.8%   | 724   | 480 | 82  | 0.250 | 99.8%   |
| rs997906  | 1953    | 518  | 36  | 0.118 | 97.3%   | 1001  | 258 | 17  | 0.114 | 99.1%   |

NOTE.- Genotype counts for major allele homozygotes (1/1), heterozygotes (1/2) and minor allele homozygotes (2/2); Freq, minor allele frequency; Success, percentage genotyping success; HWE, exact test Hardy-Weinberg equilibrium *P*-value (controls only).



**Table S6E. *CD36* genotyping assay performance (Malawian, Kenyan & Ghanaian studies).**

| Marker                   |          | 1/1 | 1/2 | 2/2 | Freq  | Success | HWE   |
|--------------------------|----------|-----|-----|-----|-------|---------|-------|
| T1264G                   |          |     |     |     |       |         |       |
| Family-based studies     |          |     |     |     |       |         |       |
| Malawi                   | Parents  | 375 | 84  | 3   | 0.097 | 98.7%   | -     |
|                          | Cases    | 188 | 31  | 8   | 0.104 | 97.0%   | -     |
| Kenya                    | Parents  | 371 | 67  | 8   | 0.093 | 99.1%   | -     |
|                          | Cases    | 182 | 42  | 0   | 0.094 | 99.6%   | -     |
| Population-based studies |          |     |     |     |       |         |       |
| Malawi                   | Controls | 334 | 64  | 4   | 0.090 | 99.3%   | 0.544 |
|                          | Cases    | 603 | 111 | 4   | 0.083 | 100.0%  | -     |
| Kenya                    | Controls | 754 | 140 | 4   | 0.082 | 99.6%   | 0.506 |
|                          | Cases    | 568 | 126 | 4   | 0.096 | 98.6%   | -     |
| Ghana                    | Controls | 553 | 183 | 15  | 0.142 | 93.2%   | 1.0   |
|                          | Cases    | 561 | 174 | 22  | 0.144 | 95.6%   | -     |
| G1439C                   |          |     |     |     |       |         |       |
| Population-based studies |          |     |     |     |       |         |       |
| Ghana                    | Controls | 689 | 2   | 0   | 0.001 | 85.7%   | 1.0   |
|                          | Cases    | 727 | 2   | 0   | 0.001 | 92.1%   | -     |

NOTE.- Genotype counts for major allele homozygotes (1/1), heterozygotes (1/2) and minor allele homozygotes (2/2); Freq, minor allele frequency; Success, percentage genotyping success; HWE, exact test Hardy-Weinberg equilibrium *P*-value (controls only).

**Figure S1. Distant decay in EHH surrounding T1264G in the HapMap Yoruba.**

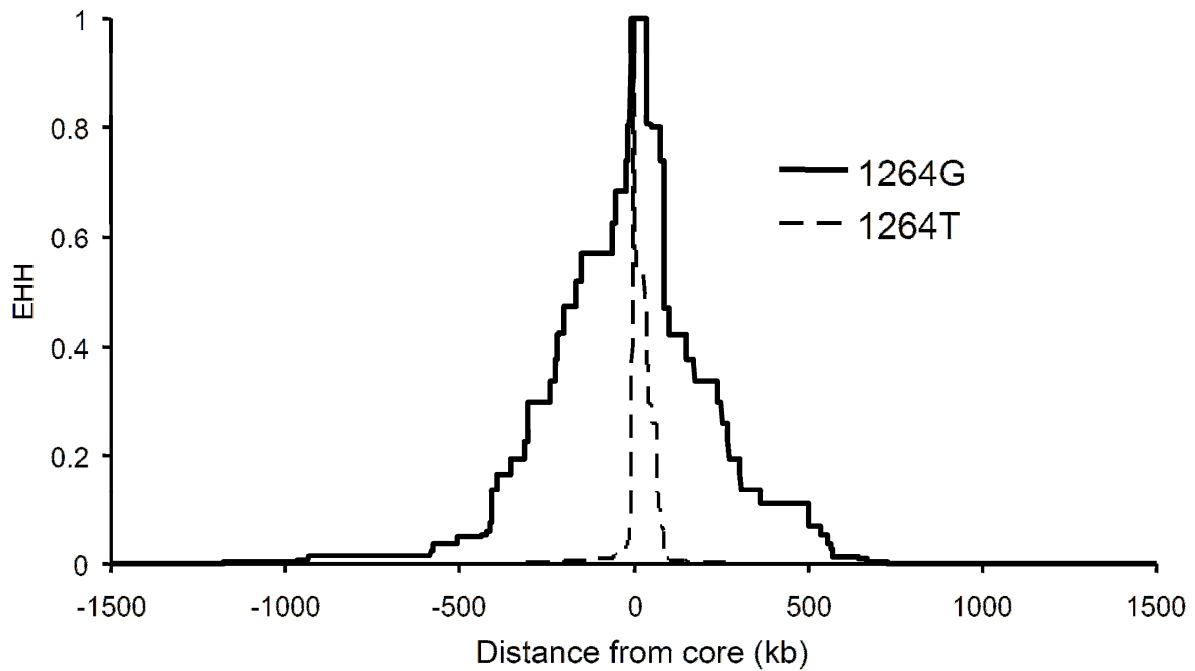

Breakdown of extended haplotype homozygosity (EHH) with distance on haplotypes partitioned by the alleles of T1264G (rs3211938; the 'core' SNP). Phased haplotype data (comprising 3627 polymorphic markers) from 30 Yoruba parent-offspring trios (120 parental haplotypes) downloaded from the HapMap project (HapMap release 21a, January 2007). Subtle differences between 1264G- and T-haplotypes are detectable over 1.1 Mb upstream and 0.7 Mb downstream of the core SNP.

**Figure S2. The effects of using offspring genotypes to resolve phase of parental haplotypes.**

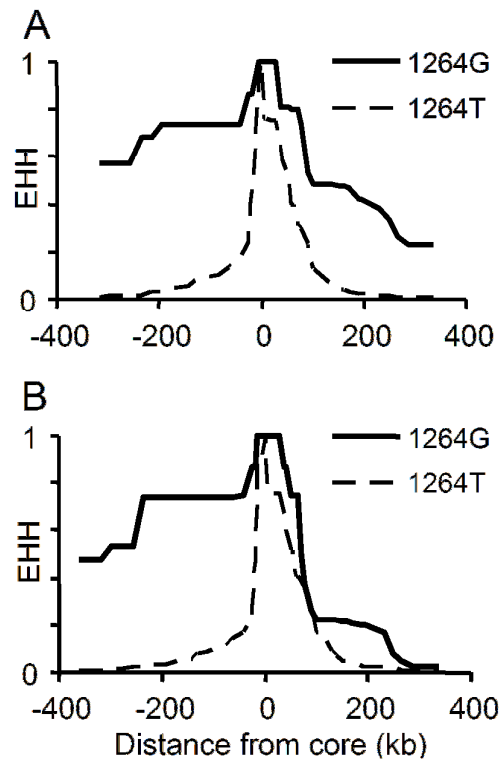

EHH decay surrounding T1264G in 30 HapMap Yoruba parent-offspring trios. We compared (A) parental haplotypes phased using offspring genotypes to help resolve phase, and (B) parental haplotypes phased without using offspring genotypes to help resolve phase. Note that the lack of offspring genotypes particularly impacts EHH values 3' to T1264G.
